# Supplementary material for: Self-assembled bismuth telluride films with well-aligned zero- to three-dimensional nanoblocks for thermoelectric applications
Source: Royal Society of Chemistry journal article supplement (doi:10.1039/c1ce05350g), 2011-01-01
Supplement: c1ce05350g.pdf [file c1ce05350g.pdf]

### Supporting Information:

Figure S1 shows the XRD pattern of the sintered  $\text{Bi}_2\text{Te}_3$  target with indexes (JCPDS 89-4302) scanned in the  $\theta$ - $2\theta$  configuration. The XRD pattern confirmed the existence and the crystal structure of the single phase  $\text{Bi}_2\text{Te}_3$ .

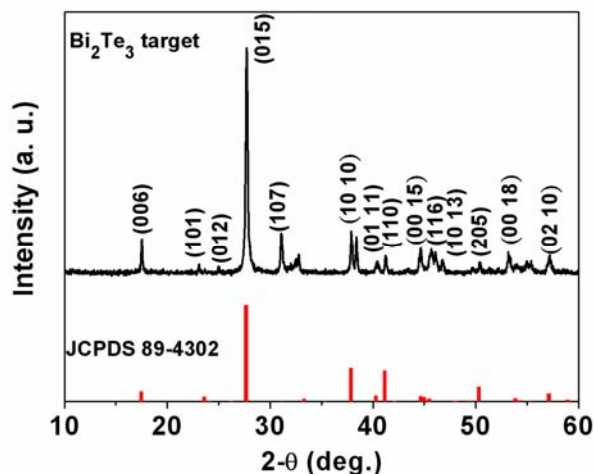

**Fig. S1** the XRD pattern of the sintered  $\text{Bi}_2\text{Te}_3$  target with indexes (JCPDS 89-4302) scanned in the  $\theta$ - $2\theta$  configuration.

Figure S2 (a) shows the cross section SEM image and reveals a film thickness of  $\sim 1.1$   $\mu\text{m}$ . As can be seen from the top view SEM images, there exists less morphological difference between the thick 0-D nanoparticle film (Fig. S2(b)) and the thinner one (Fig. 1(e)), indicating the thickness independent assembling structure of the present 0-D case.

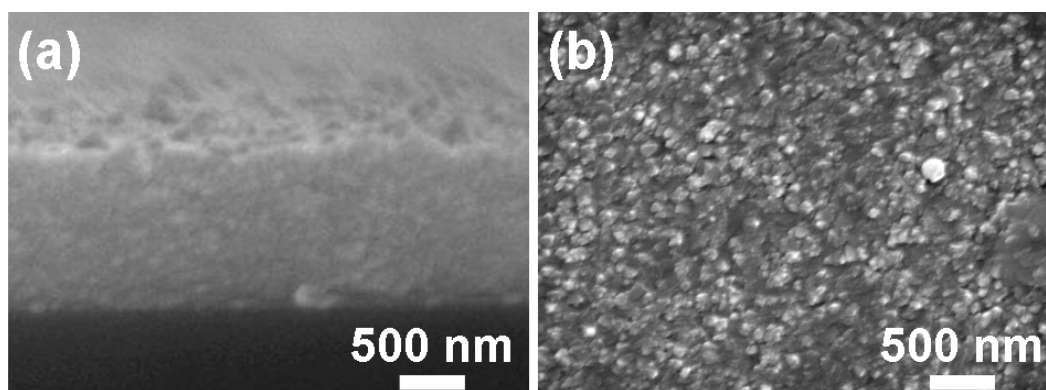

**Fig. S2** (a) The cross section and (b) the top view SEM images of the 0-D nanoparticle  $\text{Bi}_2\text{Te}_3$  film with a film thickness of  $\sim 1.1$   $\mu\text{m}$ .

Most importantly, the features as observed in the current-voltage (I-V) plot (see Fig. S3(a)) and in the Seebeck coefficient plot (n-type semiconductor) (see Fig. S3(b)) of the thicker 0-D film ( $\sim 1.1 \mu\text{m}$ ) are same as the thinner one ( $\sim 350 \text{ nm}$ ). The measured room-temperature resistance, electrical conductivity, Seebeck coefficient, and the corresponding power factor is  $190 \Omega$ ,  $219 \text{ Scm}^{-1}$ ,  $-94 \mu\text{VK}^{-1}$ , and  $1.94 \mu\text{Wcm}^{-1}\text{K}^{-2}$  (see Table S1), respectively. Increase of the film thickness from  $\sim 350 \text{ nm}$  to  $\sim 1.1 \mu\text{m}$  seems to lead only very slight changes of the thermoelectric related values. Thus, according to these direct experimental evidences, we consider that for 0-D nanoparticle  $\text{Bi}_2\text{Te}_3$  film, the thickness is not an effective factor for changing or modifying the thermoelectric properties.

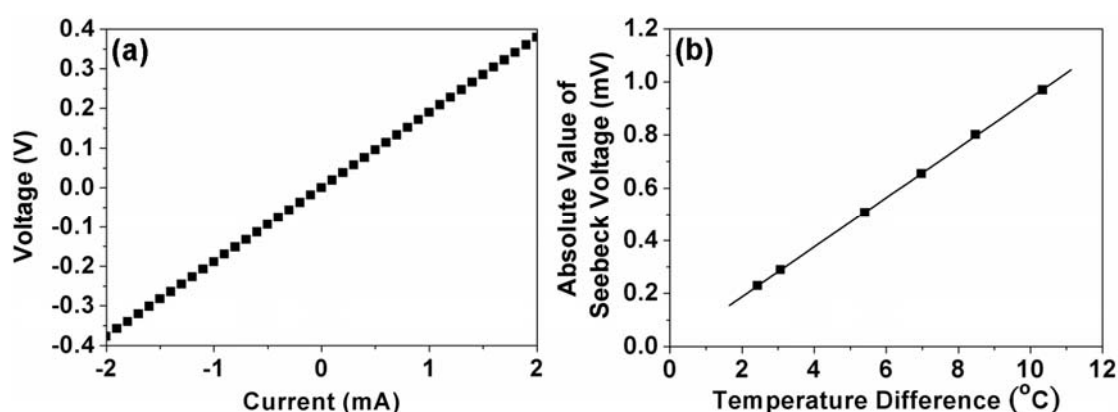

**Fig. S3** (a) The I-V curve and (b) the Seebeck voltage plotted as a function of the temperature difference across the 0-D nanoparticle  $\text{Bi}_2\text{Te}_3$  film with a film thickness of  $\sim 1.1 \mu\text{m}$ .

**Table S1** Room-temperature thermoelectric properties of the 0-D nanoparticle  $\text{Bi}_2\text{Te}_3$  film with a film thickness of  $\sim 1.1 \mu\text{m}$ .

| Sample name      | Electrical conductivity<br>( $\text{Scm}^{-1}$ ) | Seebeck coefficient<br>( $\mu\text{VK}^{-1}$ ) | Power factor<br>( $\mu\text{Wcm}^{-1}\text{K}^{-2}$ ) |
|------------------|--------------------------------------------------|------------------------------------------------|-------------------------------------------------------|
| 0-D nanoparticle | 219                                              | -94                                            | 1.94                                                  |
